# Supplementary material
Source: publisher figshare collection journal article supplement (https://acs.figshare.com/ndownloader/files/7622377)
Supplement: Supplementary file 1 [file 7622377]

Supporting Information for

“Structural and Electronic Properties of Hydrated  
 $V_nH_2O$  and  $V_n^+H_2O$ ,  $n \leq 13$ , Systems”

Brandon Meza,<sup>1</sup> Patricia Miranda,<sup>1</sup> and Miguel Castro<sup>\*1</sup>

<sup>1</sup>Departamento de Física y Química Teórica, DEPg. Facultad de Química, UNAM, Del. Coyoacán,  
México D.F., 04510, México

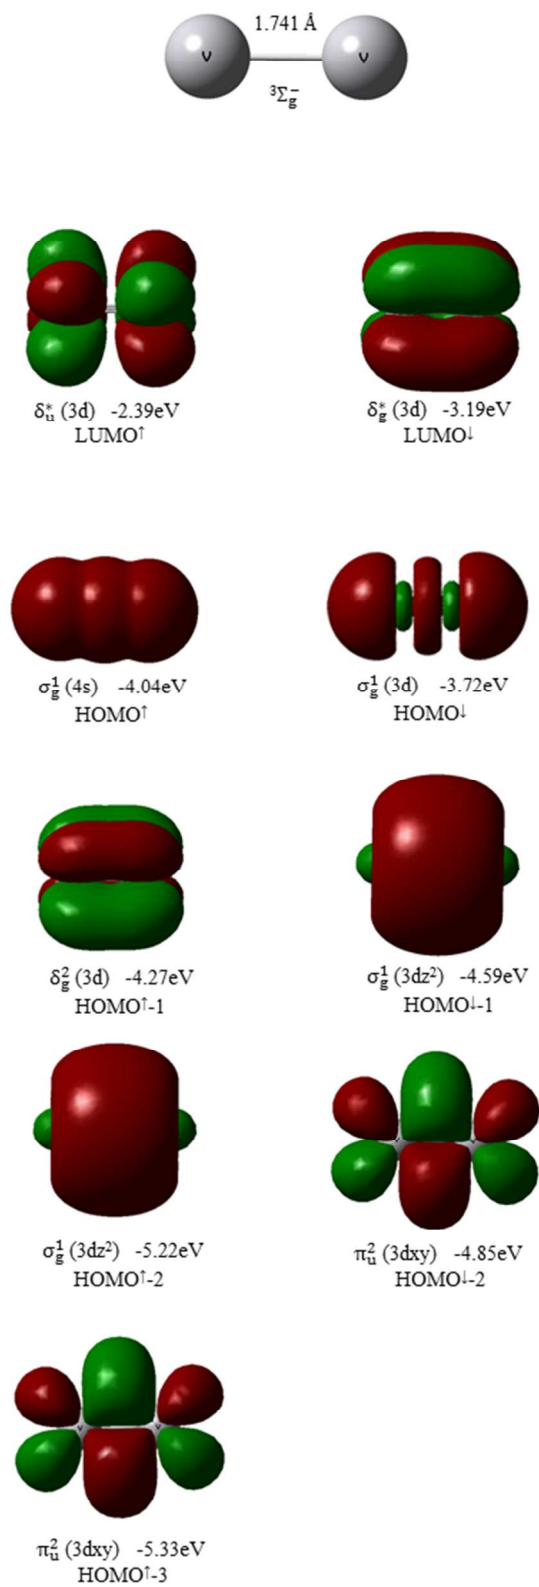

Figure S1. Frontier molecular orbitals for the lowest energy state of the  $\text{V}_2$  dimer.

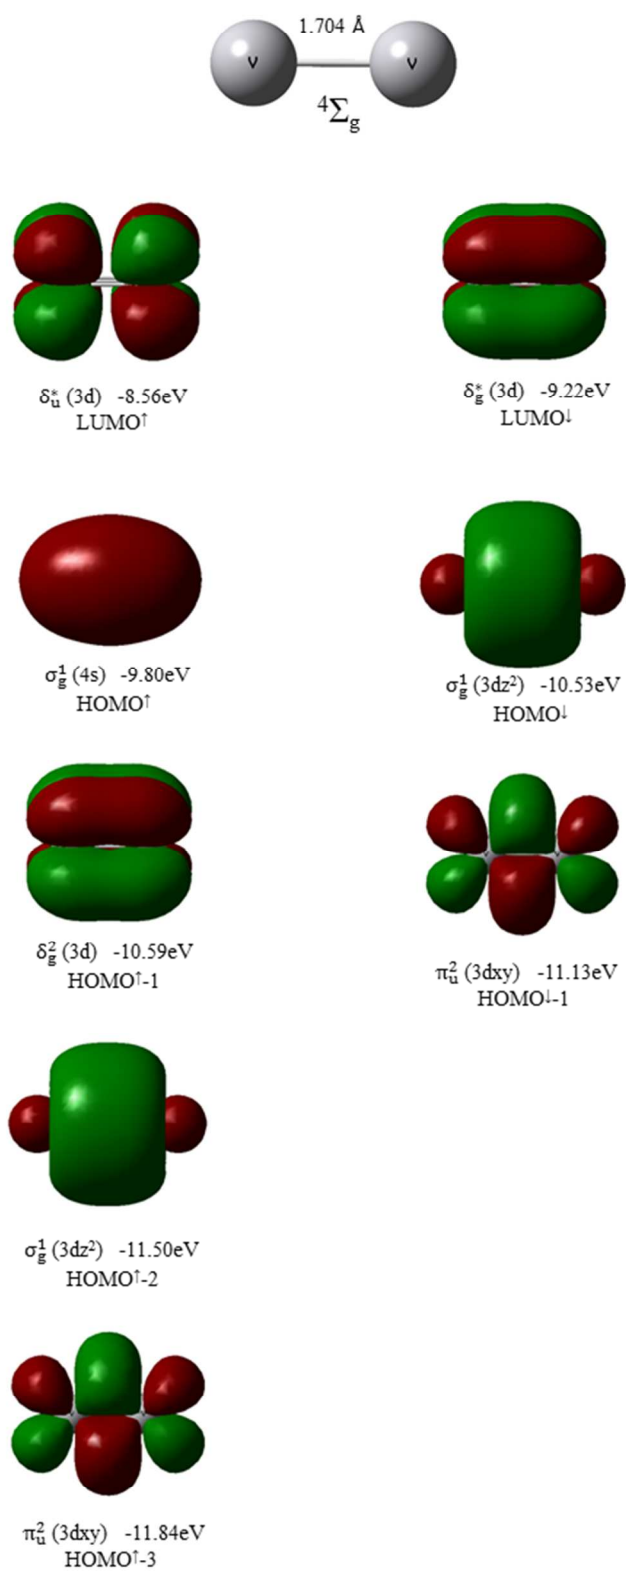

Figure S2. Frontier molecular orbitals for the ground state of the  $V_2^+$  ion.

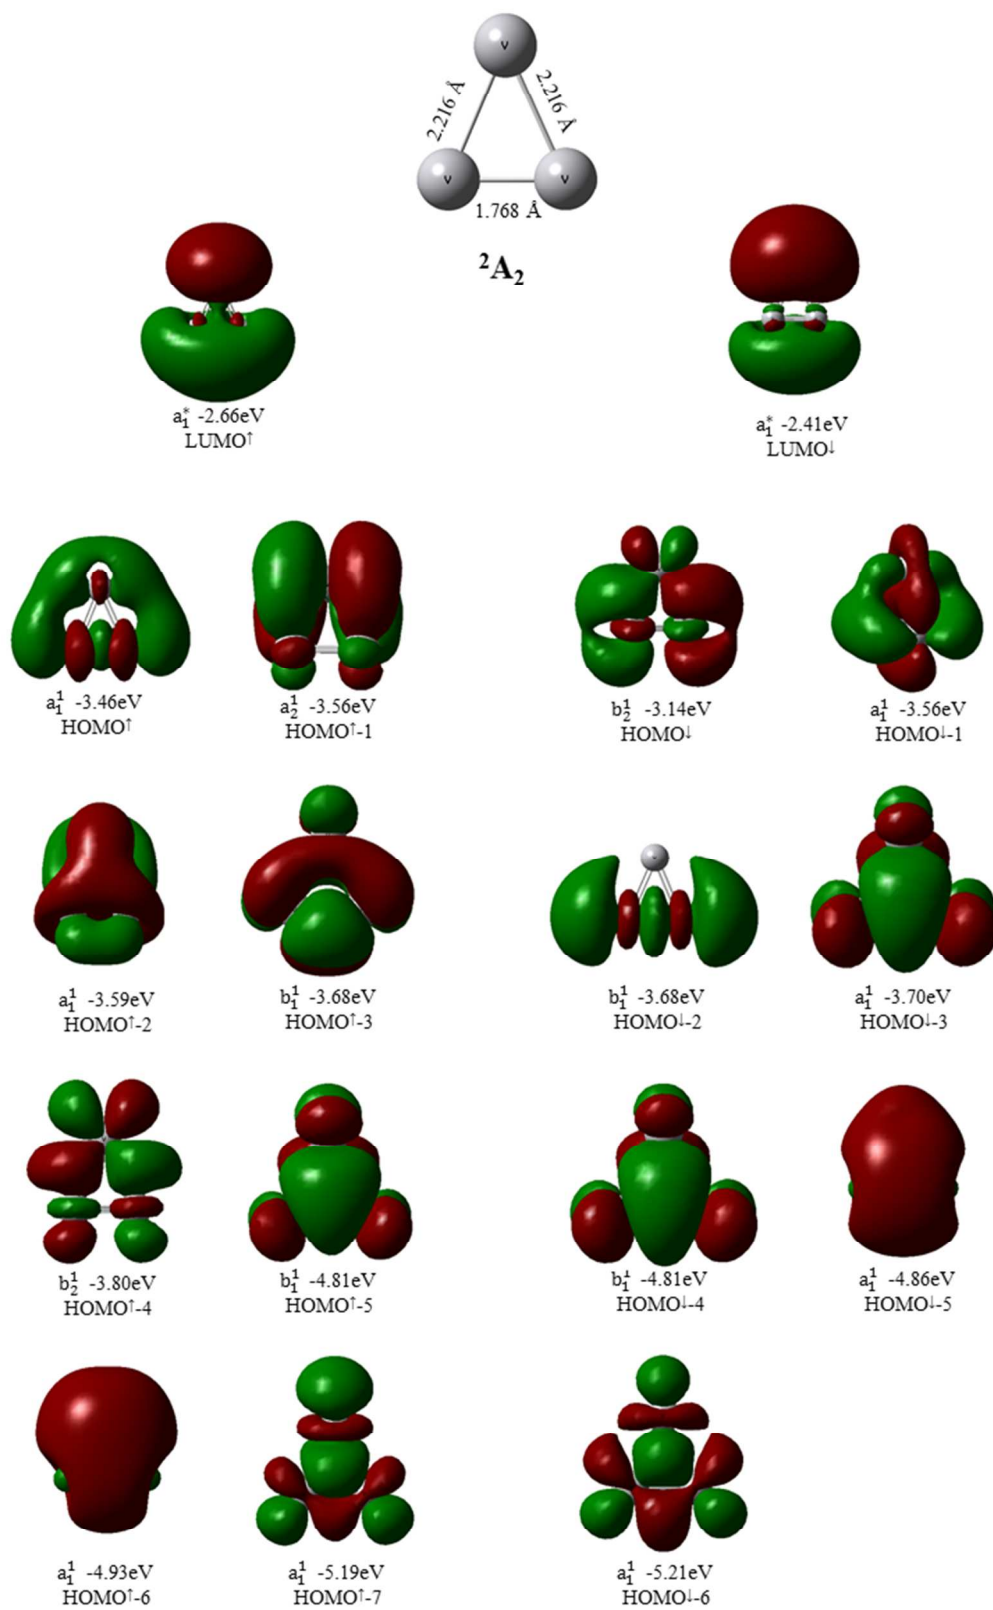

Figure S3. Molecular orbitals for the low-lying state of the  $V_3$  cluster.

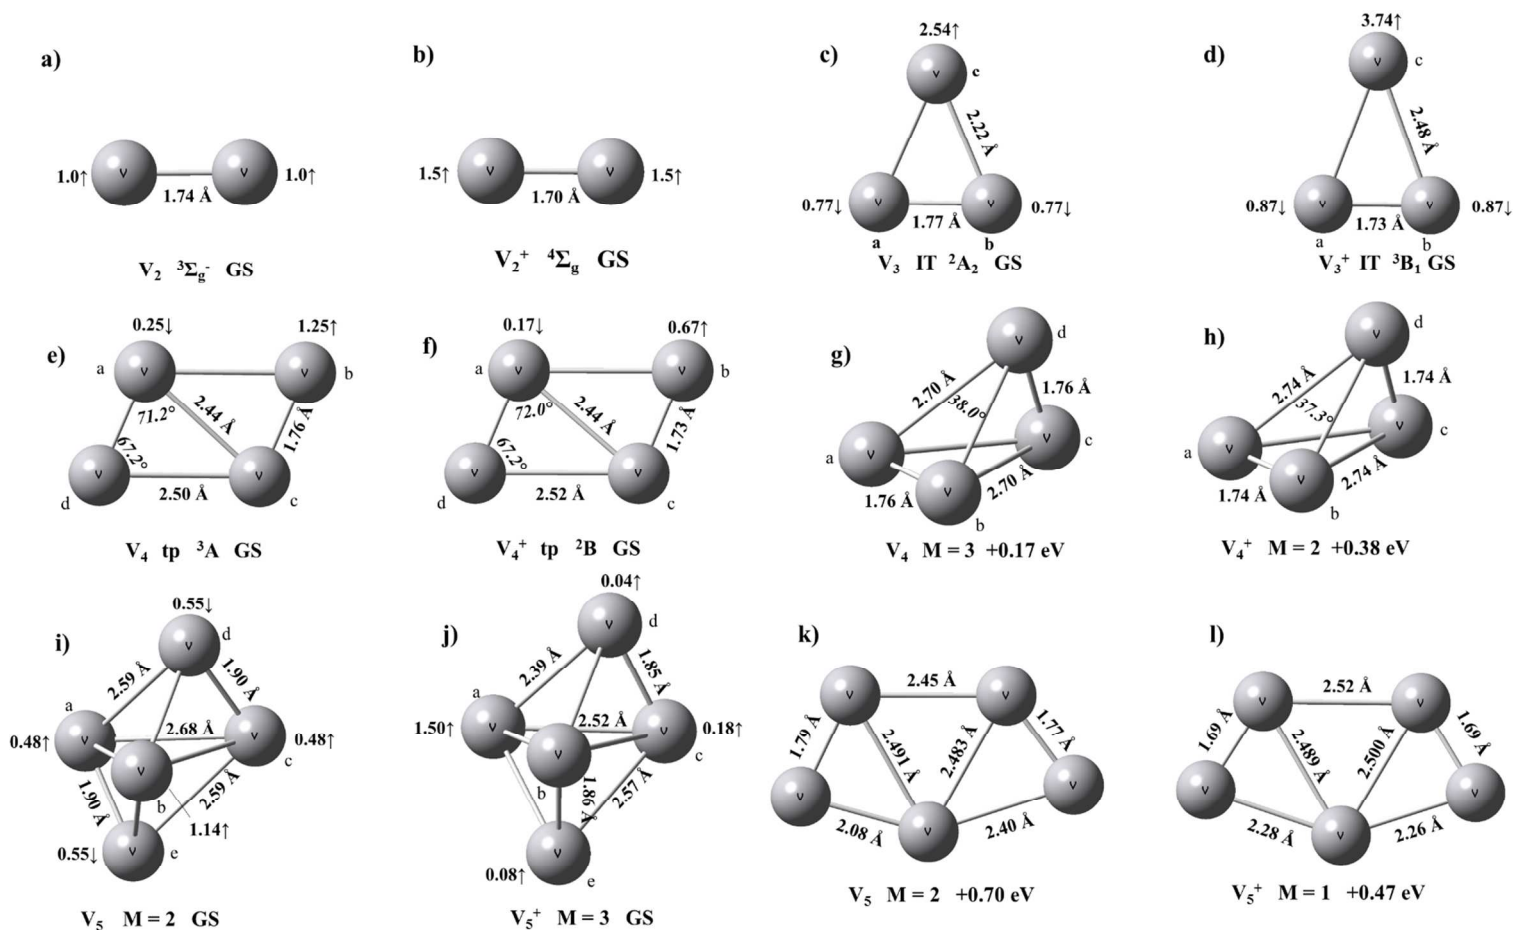

Figure S4. Calculated lowest energy structures for neutral and positively charged,  $V_n^{0,+}$ ,  $2 \leq n \leq 5$ , clusters. Relative energies in eV, bond lengths in Å, NBO charges in electrons (e), and spin distributions (marked by arrows) are shown.

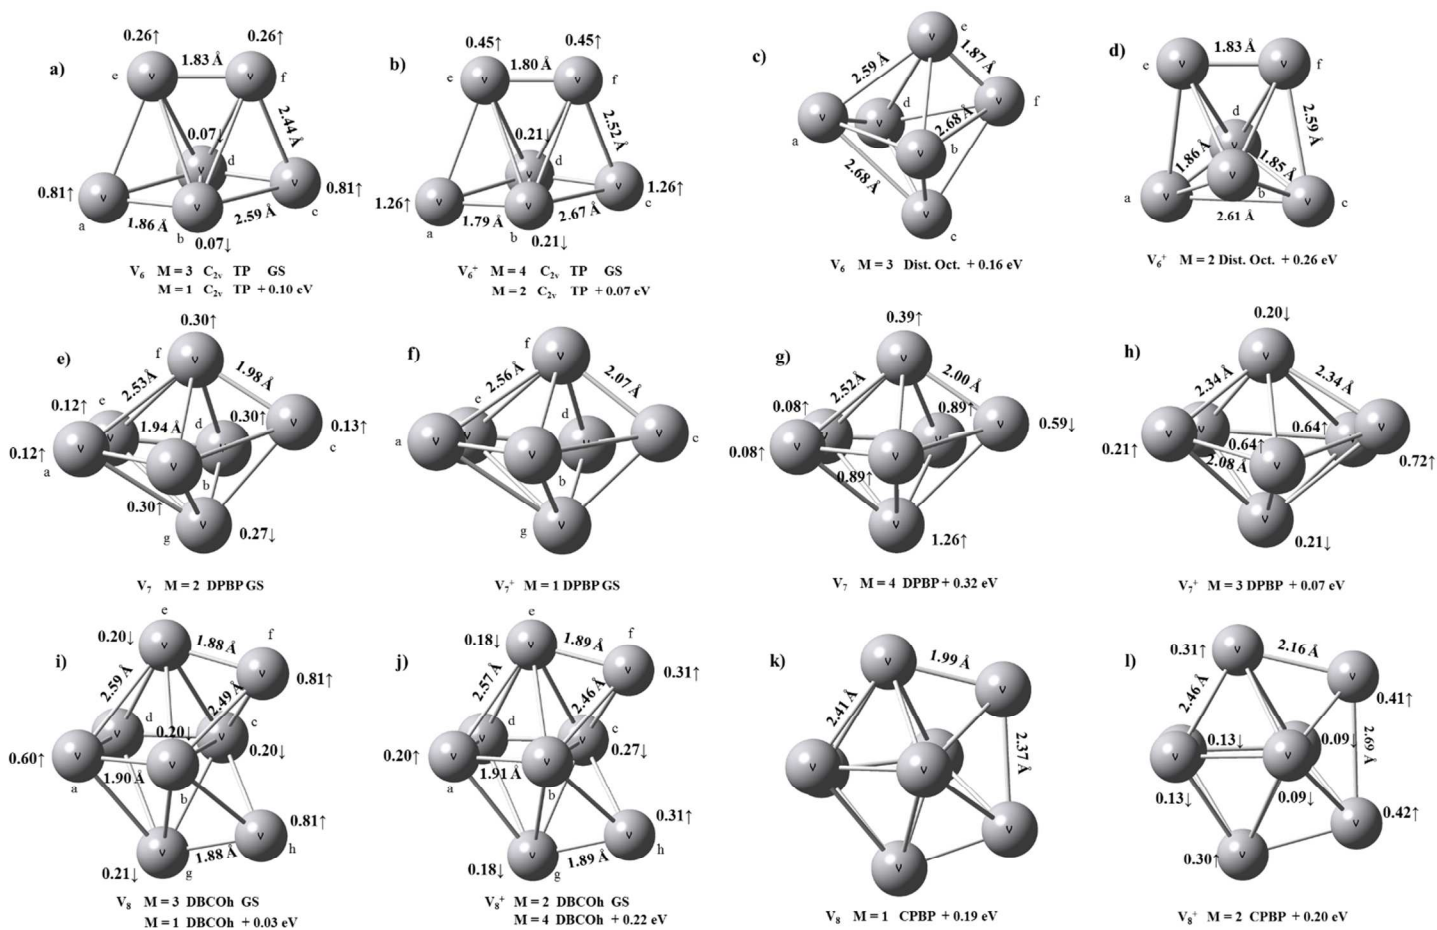

Figure S5. Lowest energy structures for neutral,  $V_n$ , and charged,  $V_n^+$ ,  $6 \leq n \leq 8$ , clusters. Relative energies in eV, bond lengths in Å, charges in electrons (e), and spin distributions (marked by arrows) are shown.

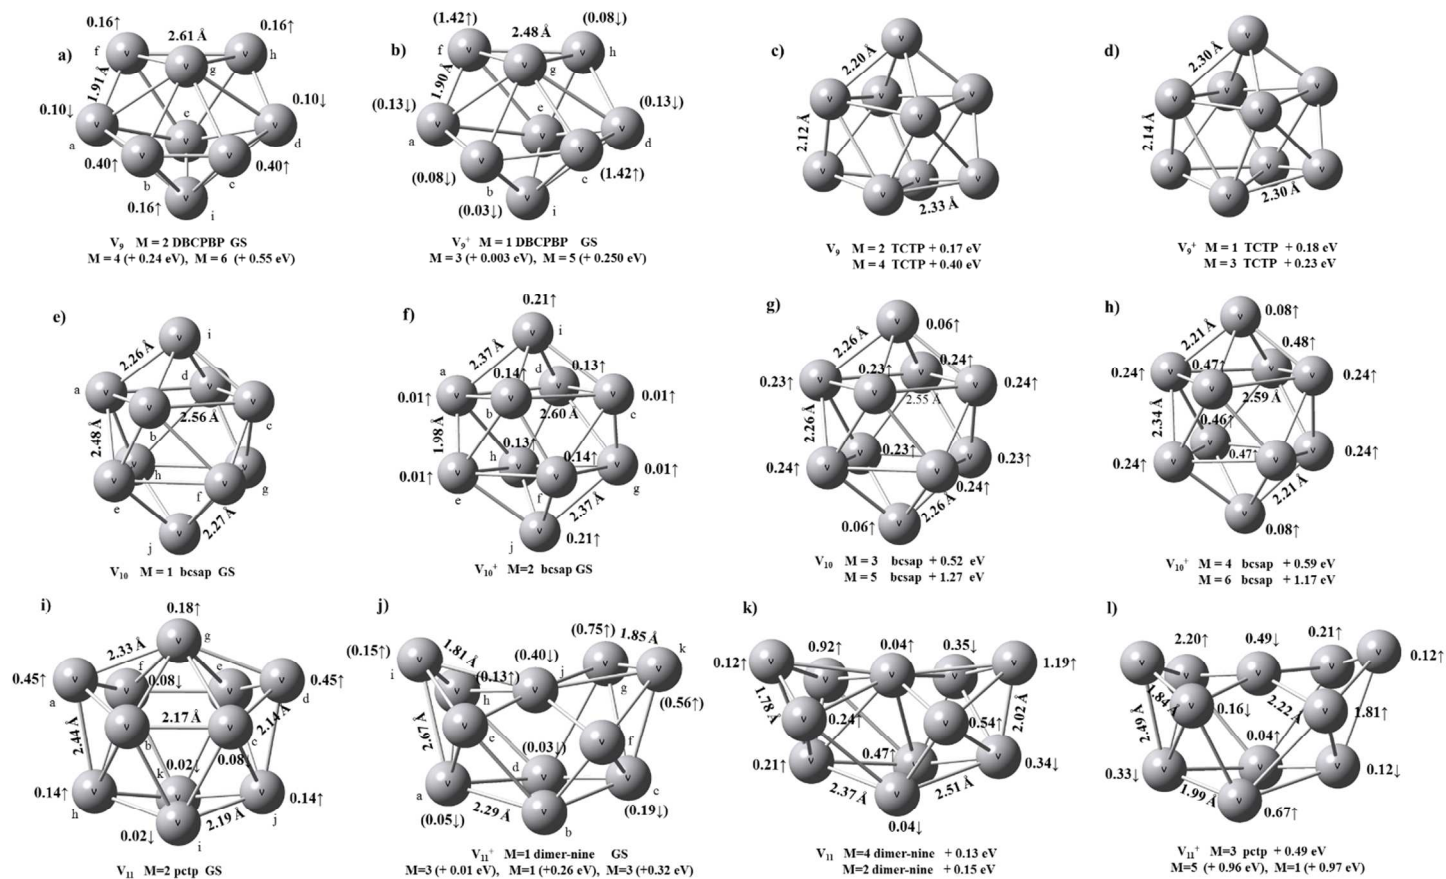

Figure S6. Most stable structures for neutral,  $V_n$ , and charged,  $V_n^+$ ,  $9 \leq n \leq 11$ , clusters. Relative energies in eV, bond lengths in Å, charges in electrons (e), and spin distributions (marked by arrows) are shown.



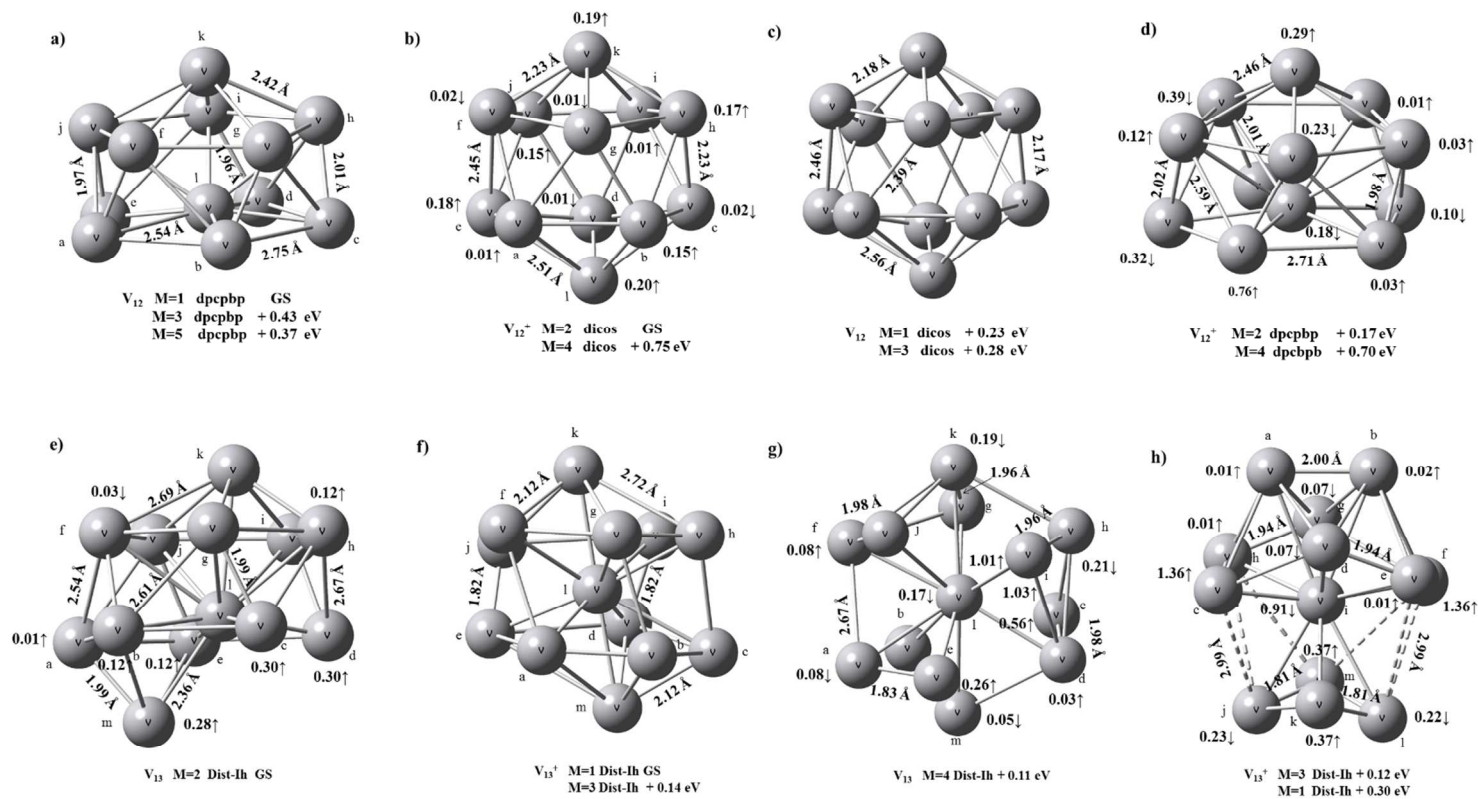

Figure S7. Lowest energy structures for neutral,  $V_n$ , and charged,  $V_n^+$ ,  $12 \leq n \leq 13$ , clusters. Relative energies in eV, bond lengths in Å, charges in electrons (e), and spin distributions (marked by arrows) are indicated.



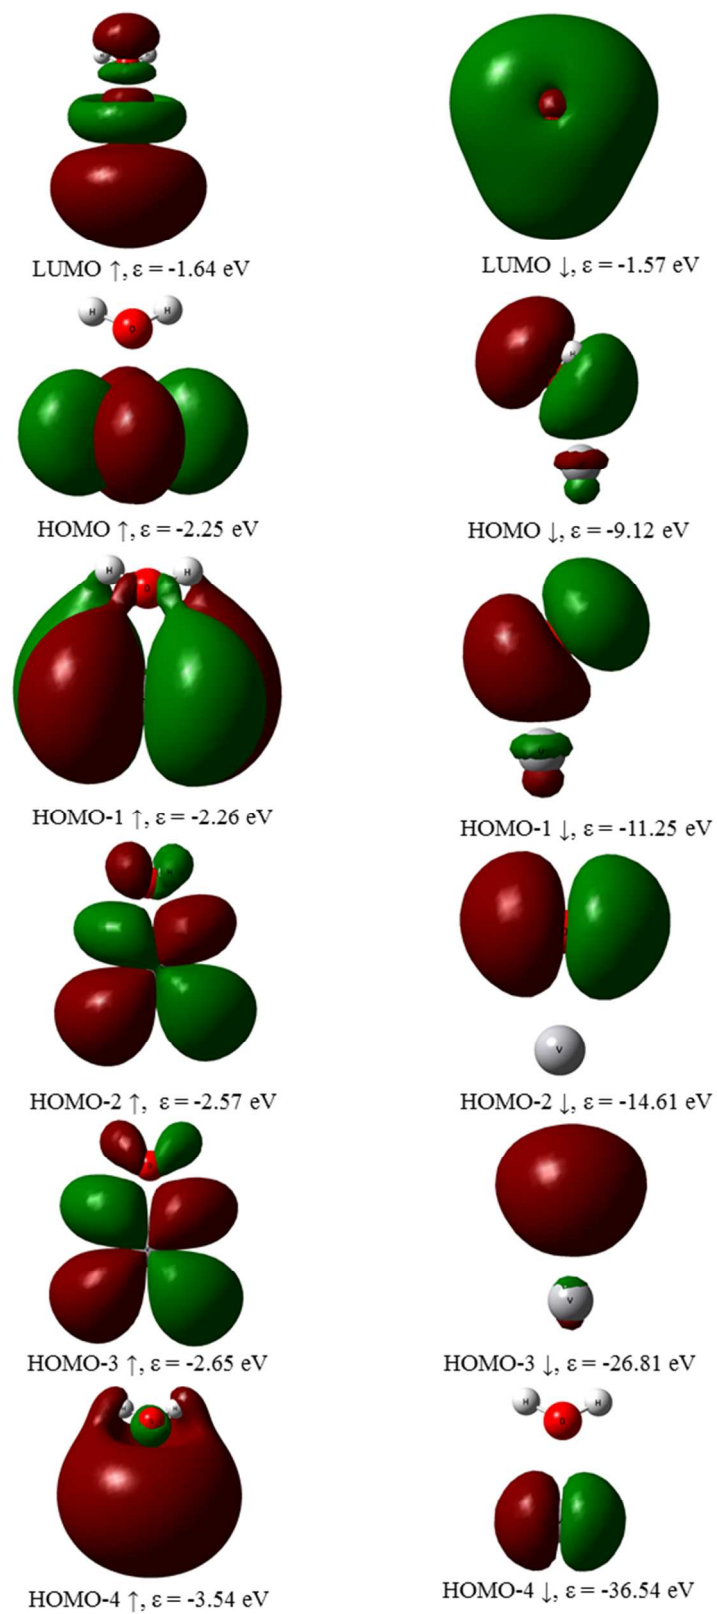

Figure S8. Frontier molecular orbitals for the low-lying state of the V-H<sub>2</sub>O system.

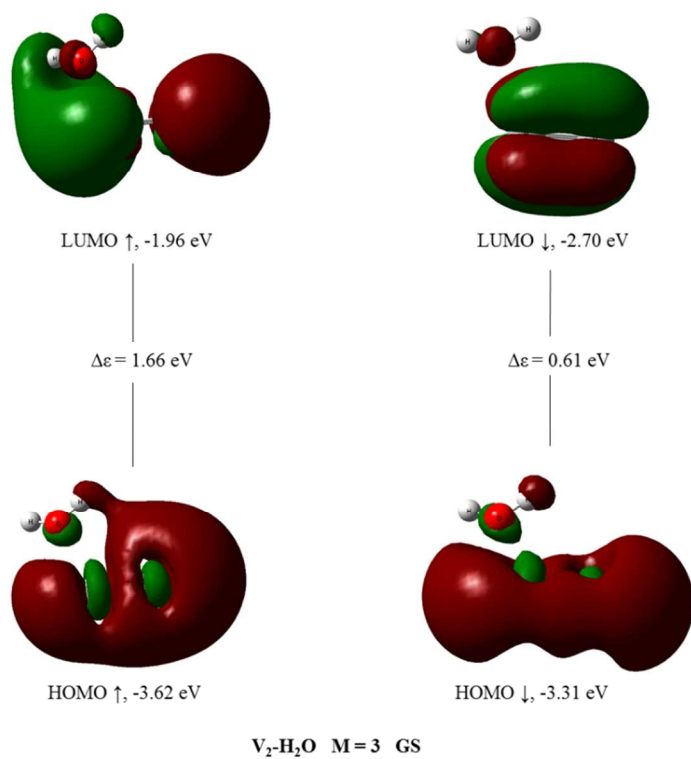

Figure S9. Contour plots for HOMO and LUMO of the  $V_2-H_2O$  cluster.

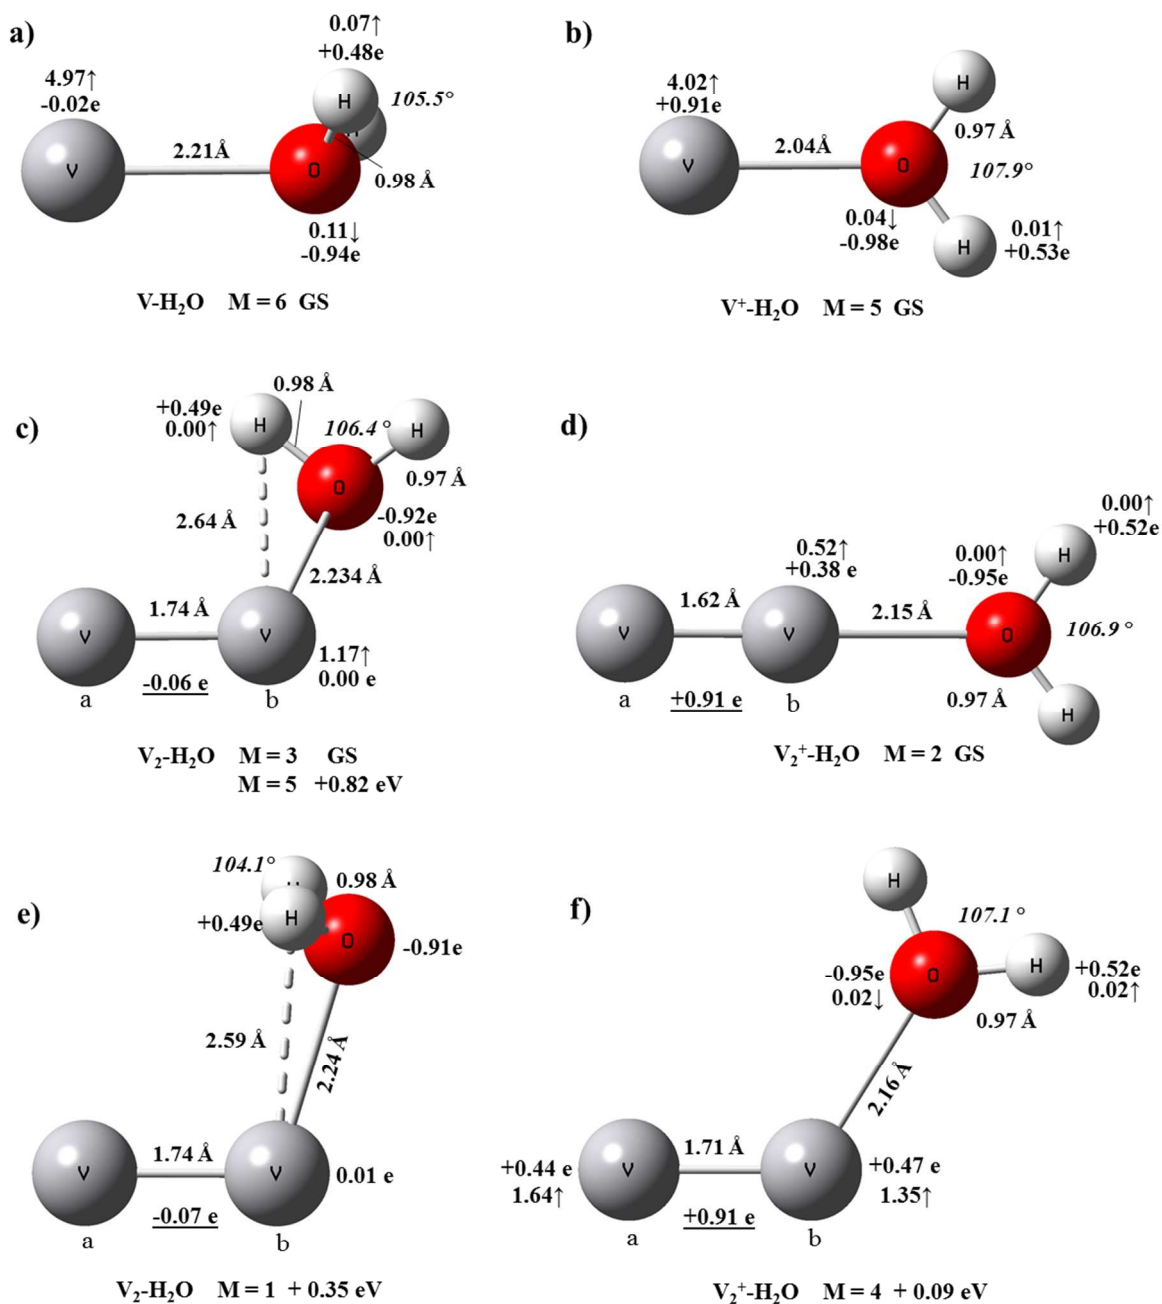

Figure S10. Lowest energy coordination modes for neutral, V<sub>n</sub>-H<sub>2</sub>O, and charged, V<sub>n</sub><sup>+</sup>-H<sub>2</sub>O, n = 1 and 2, systems. Relative energies, in eV, some distances, in Å, NBO charges in electrons (e), underlined values are for the total charge on the V<sub>n</sub> subcluster, spin distributions (values with arrows) are indicated.

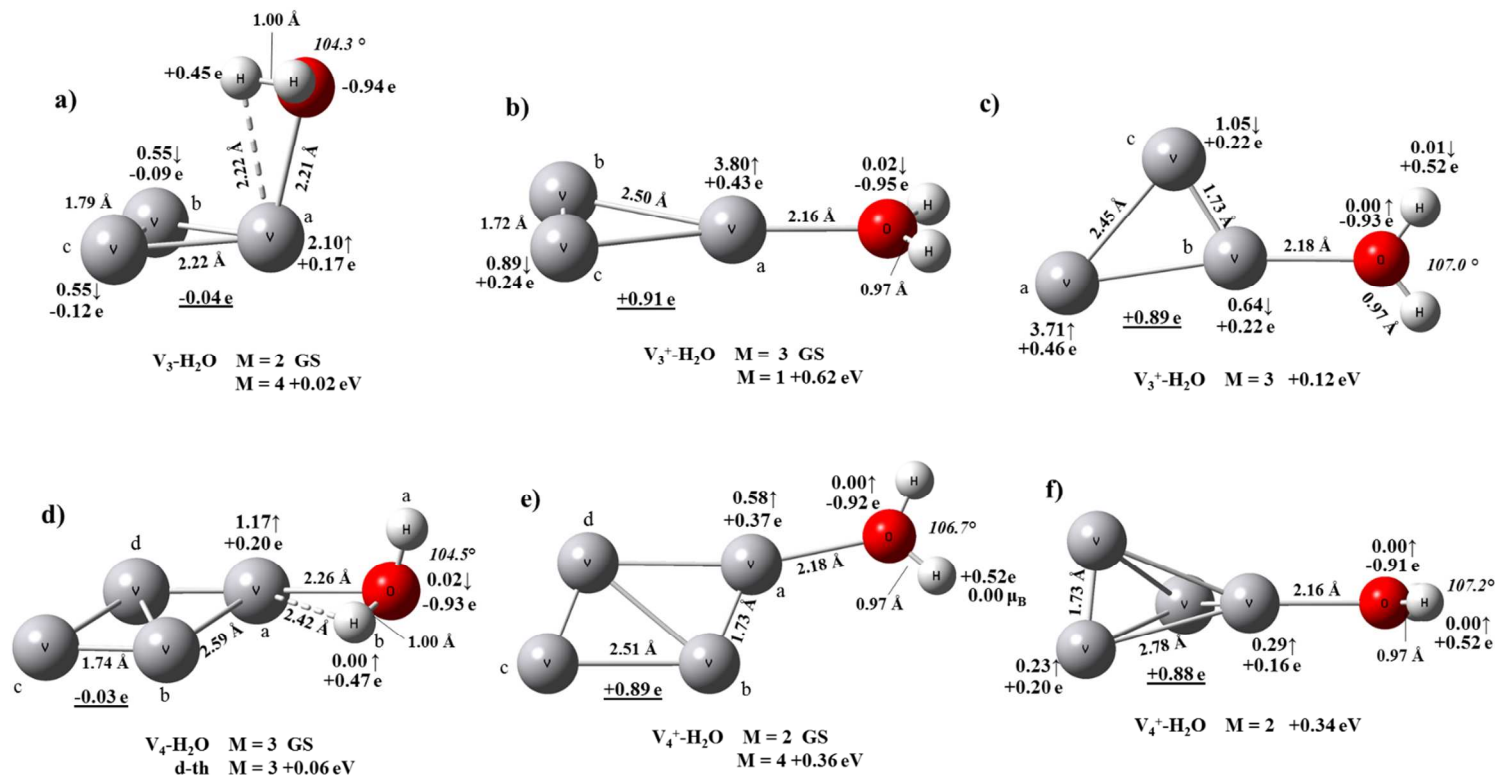

Figure S11. Lowest energy coordination modes for neutral,  $V_n-H_2O$ , and charged,  $V_n^+-H_2O$ ,  $n = 3$  and 4, clusters. Relative energies, in eV, some distances, in Å, NBO charges in electrons (e), underlined values are for the total charge on the  $V_n$  subcluster, spin distributions (marked by arrows) are indicated.

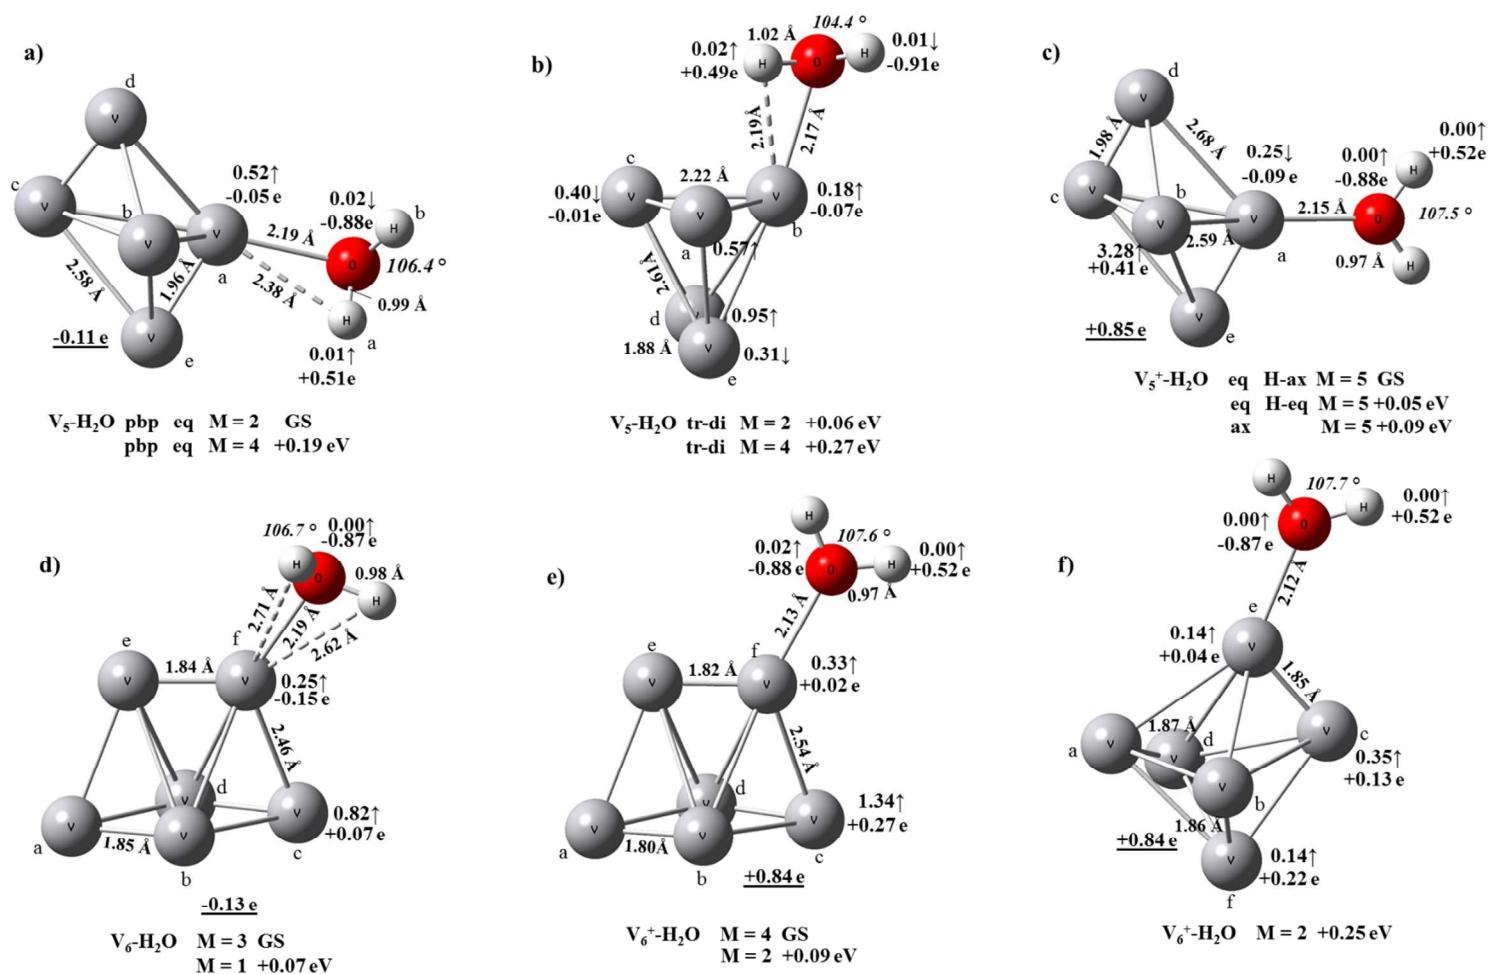

Figure S12. Lowest energy coordination modes for neutral,  $V_n-H_2O$ , and charged,  $V_n^+-H_2O$ ,  $n = 5$  and  $6$ , clusters. Relative energies, in eV, some distances, in Å, NBO charges in electrons (e), underlined values are for the total charge on the  $V_n$  subcluster, spin distributions (marked by arrows) are indicated.

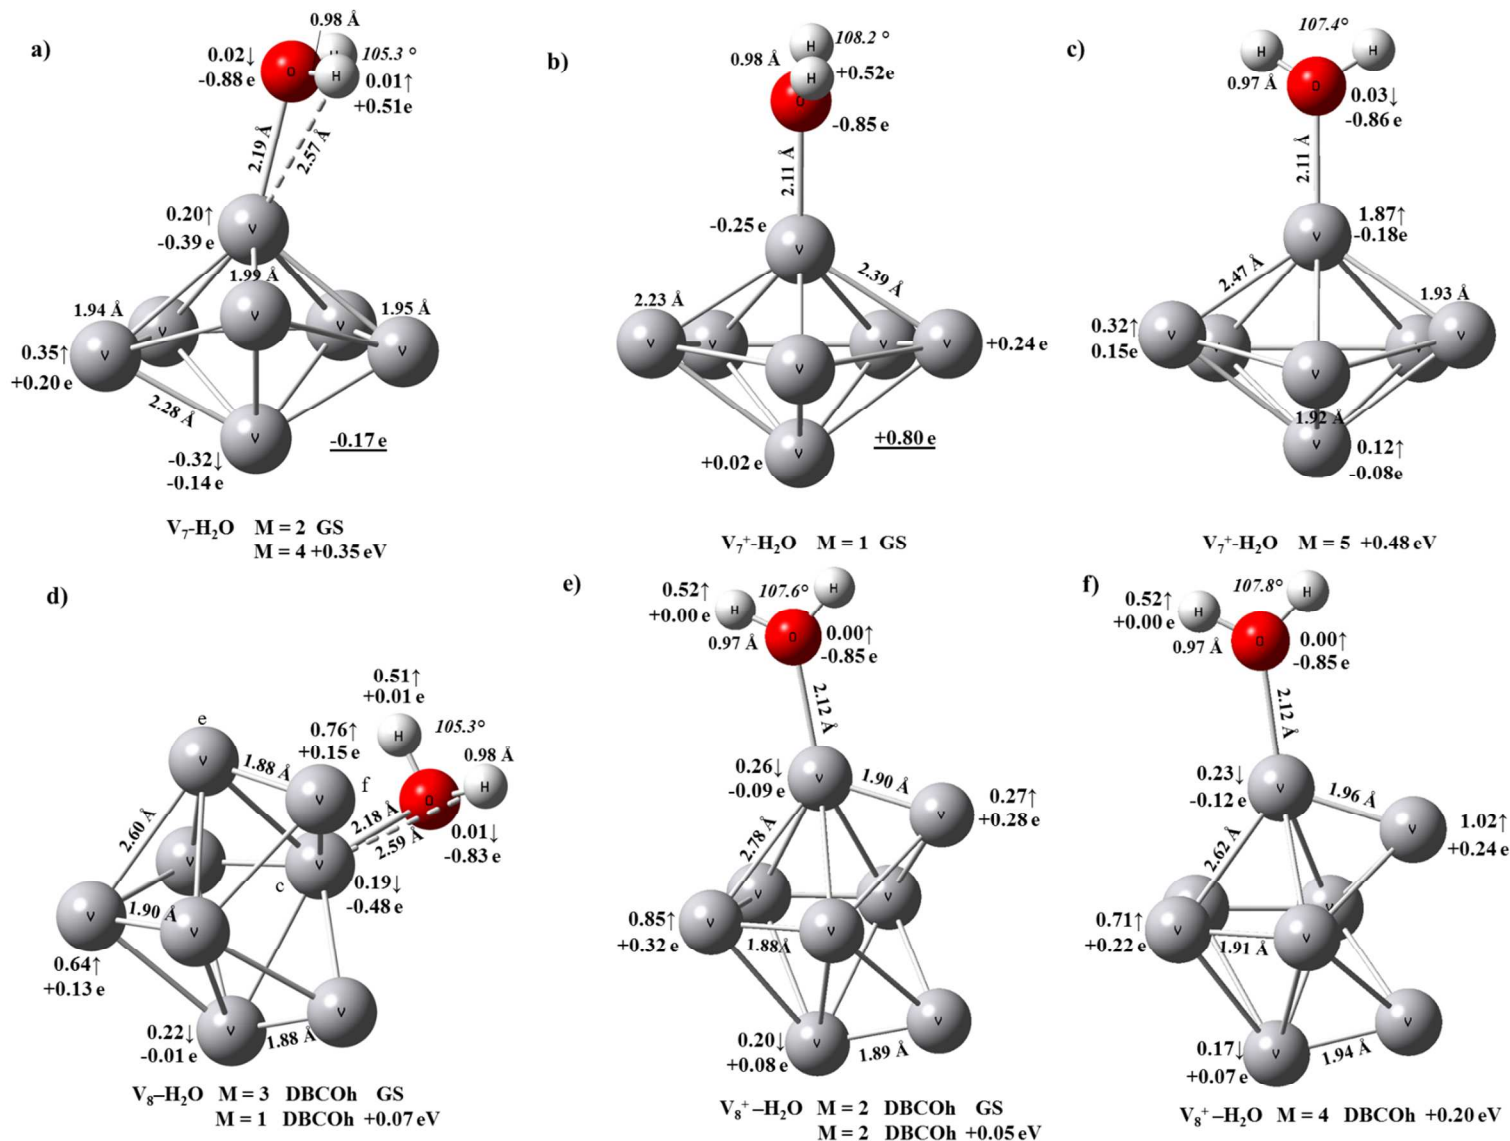

Figure S13. Lowest energy coordination modes for neutral,  $V_n-H_2O$ , and charged,  $V_n^+-H_2O$ ,  $n = 7$  and  $8$ , clusters. Relative energies, in eV, some distances, in Å, NBO charges in electrons (e), underlined values are for the total charge on the  $V_n$  subcluster, spin distributions (marked by arrows) are indicated.

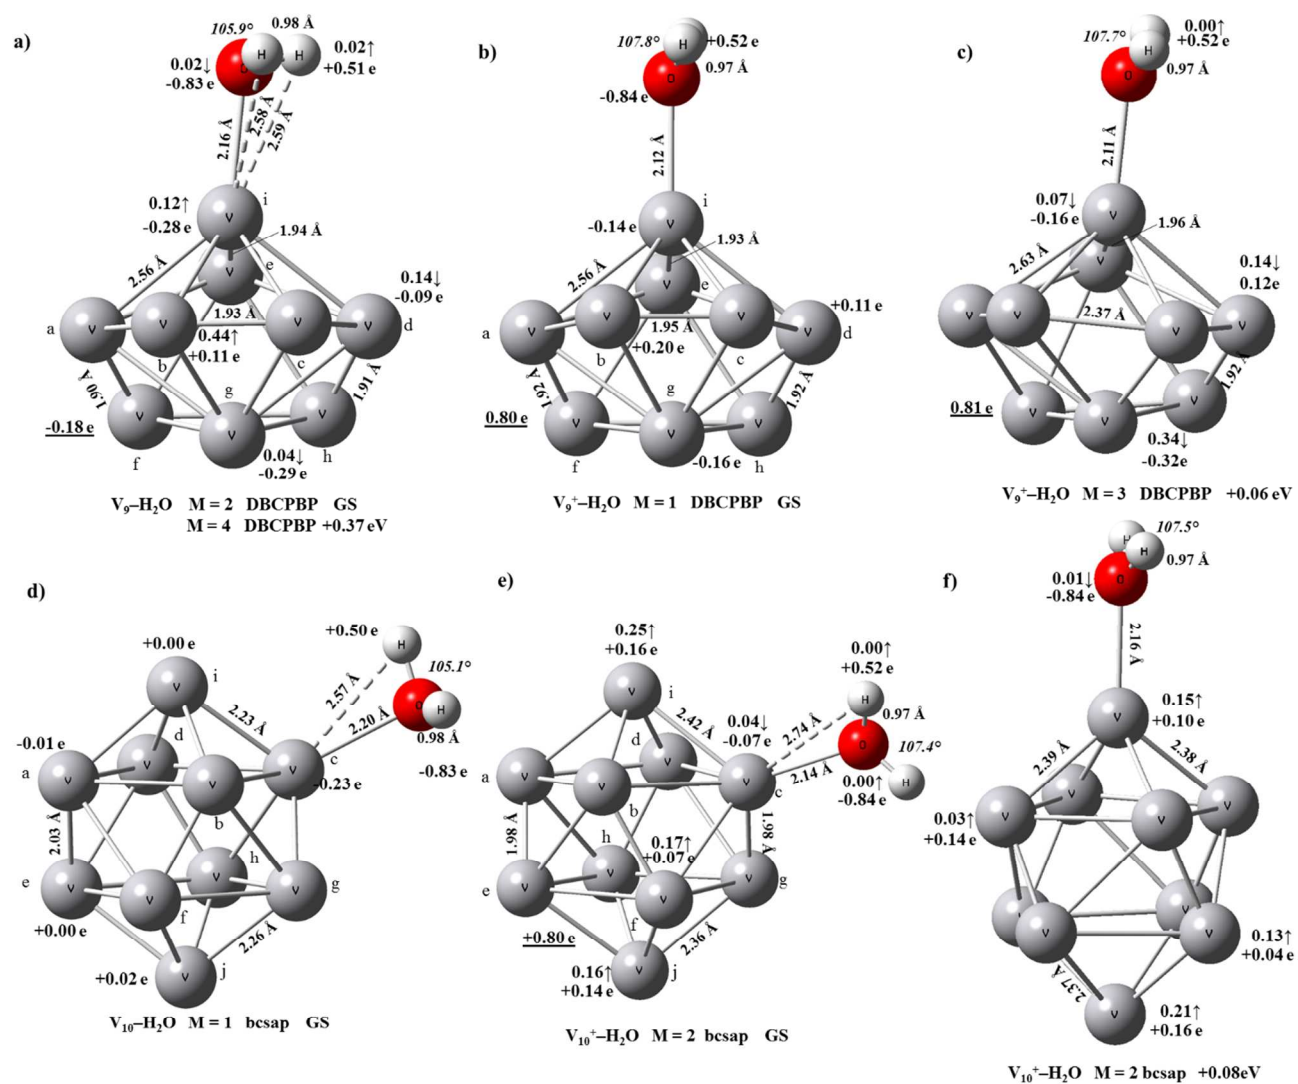

Figure S14. Lowest energy coordination modes for neutral,  $V_n-H_2O$ , and charged,  $V_n^+-H_2O$ ,  $n = 9$  and 10, clusters. Relative energies, in eV, some distances, in Å, NBO charges in electrons (e), underlined values are for the total charge on the  $V_n$  subcluster, spin distributions (marked by arrows) are indicated.



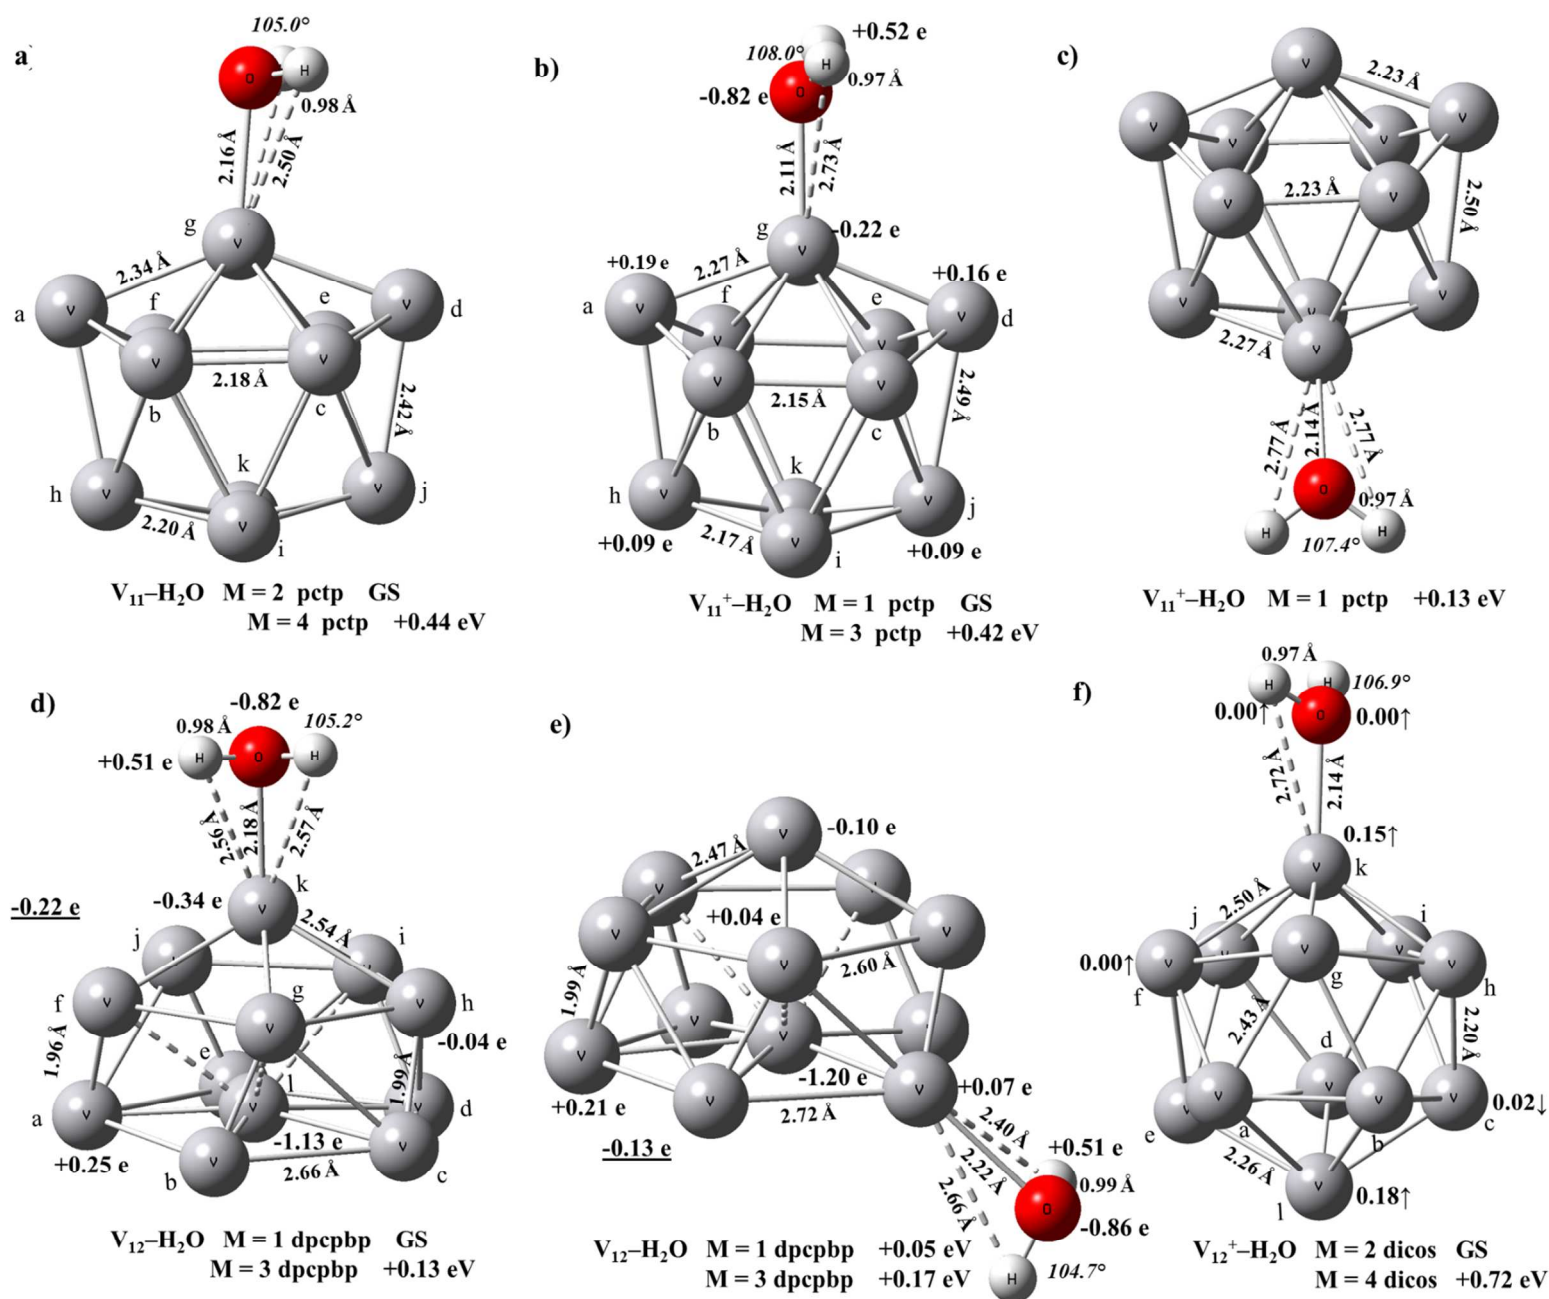

Figure S15. Lowest energy coordination modes for neutral,  $V_n-H_2O$ , and charged,  $V_n^+-H_2O$ ,  $n = 11$  and 12, clusters. Relative energies, in eV, some distances, in Å, NBO charges in electrons (e), underlined values are for the total charge on the  $V_n$  subcluster, spin distributions (marked by arrows) are indicated.

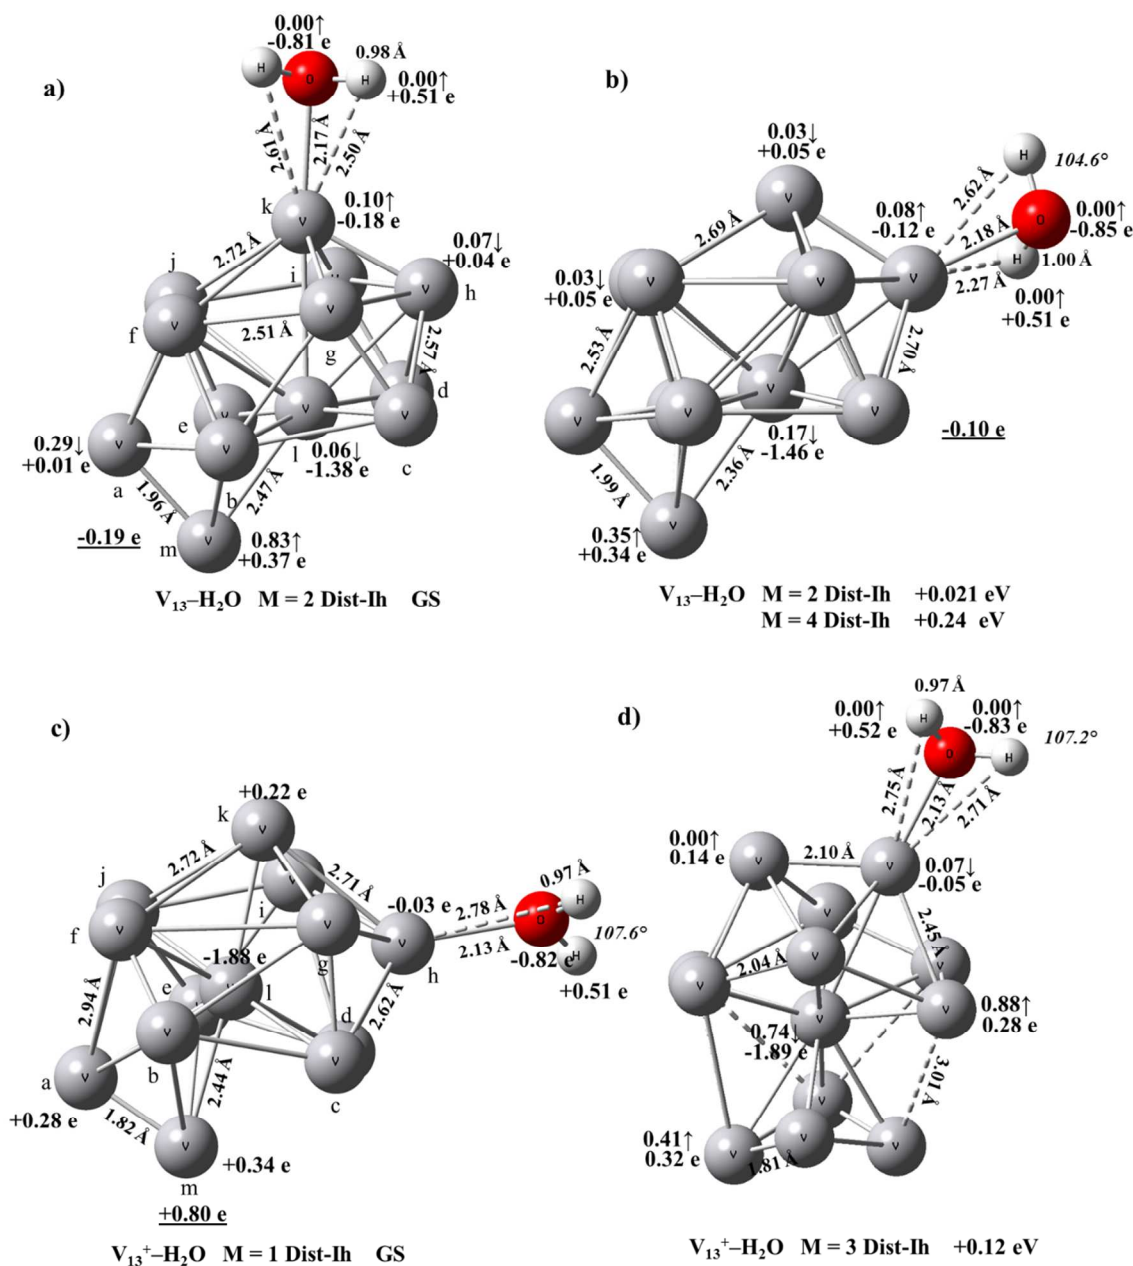

Figure S16. Lowest energy coordination modes for neutral,  $V_{13}\text{-H}_2\text{O}$ , and charged,  $V_{13}^+\text{-H}_2\text{O}$ , clusters. Relative energies, in eV, some distances, in Å, NBO charges in electrons (e), underlined values are for the total charge on the  $V_n$  subcluster, spin distributions (marked by arrows) are indicated.
